# Supplementary material for: Einmal geimpft, immer geimpft? Routinedatenanalyse zur wiederholten Influenzaimpfung von ≥ 60-Jährigen
Source: Springer Nature journal article supplement (doi:10.1007/s00103-023-03716-1), 2023-06-08
Supplement: MOESM1 [file 25463420]

Onlinematerial

**Einmal geimpft, immer geimpft?**

**Routinedatenanalyse zur wiederholten Influenzaimpfung von  $\geq 60$ -Jährigen**

**Once vaccinated, always vaccinated?**

**A claims data analysis on repeated influenza vaccinations among individuals aged  $\geq 60$  years**

Josephine Storch<sup>1, 2</sup>, Franziska Meissner<sup>1</sup>, Monique Böde<sup>1</sup>, Anja Kwetkat<sup>3</sup>, Mathias W. Pletz<sup>4</sup> & Antje Freytag<sup>1</sup>

<sup>1</sup> Universitätsklinikum Jena, Institut für Allgemeinmedizin, Friedrich-Schiller-Universität, Jena, Deutschland

<sup>2</sup> Internationale Graduierten Akademie, Medizinische Fakultät, Institut für Gesundheits- und Pflegewissenschaft, Martin-Luther-Universität Halle-Wittenberg, Halle (Saale), Deutschland

<sup>3</sup> Klinik für Geriatrie und Palliativmedizin, Klinikum Osnabrück, Osnabrück, Deutschland Klinik für Geriatrie, Universitätsklinikum Jena, Jena, Deutschland

<sup>4</sup> Universitätsklinikum Jena, Institut für Infektionsmedizin und Krankenhaushygiene, Friedrich-Schiller-Universität, Jena, Deutschland

Korrespondenzadresse:

Josephine Storch (M. Sc.)

Bachstraße 18

07743 Jena

josephine.storch@med.uni-jena.de

## Übersicht

|                                                                                                          |          |
|----------------------------------------------------------------------------------------------------------|----------|
| Primärstudie .....                                                                                       | Seite 3  |
| Abb. A1: Flowchart zum Versicherteneinschluss .....                                                      | Seite 4  |
| Datenaufbereitung: Identifikation von Inanspruchnahme- und Versichertenerkmalen .....                    | Seite 5  |
| Tab. A1: Impfungen .....                                                                                 | Seite 5  |
| Tab. A2: Personen mit erhöhter gesundheitlicher Gefährdung .....                                         | Seite 6  |
| Tab. A3: Charlson-Komorbiditäten des Charlson Comorbidity-Index (CCI) .....                              | Seite 7  |
| Ergebnisse .....                                                                                         | Seite 10 |
| Tab. A4: Beschreibung der Studienpopulation, differenziert nach Anzahl der Influenza-<br>impfungen ..... | Seite 10 |
| Literatur .....                                                                                          | Seite 14 |

## Methoden

### Primärstudie

Die Primärstudie [1, 2] erhielt von der Ethikkommission des Universitätsklinikum Jena ein positives Votum (Bearbeitungsnummer 4988-11/16) sowie die Genehmigung zur Übermittlung von Sozialdaten für die Forschung und Planung gemäß §75 SGB X durch das Sächsische Staatsministerium für Soziales und Verbraucherschutz [1, 2].

Für die Primärstudie wurden Daten derjenigen Versicherten übermittelt, die zum 01.01.2014 mindestens 60 Jahre alt waren, im Zeitraum 2008–2016 durchgängig bei der AOK Plus versichert waren, ihren Wohnsitz in Thüringen hatten oder nach 2014 verstorben waren und in 2014Q3 eine Influenzaimpfung und/oder im Jahr 2014 eine Pneumokokkenimpfung oder keine der beiden Impfungen im gesamten Beobachtungszeitraum erhalten hatten ( $n = 209.703$ , siehe Abb. A1) [1, 2].

Von der Studienpopulation der Primärstudie konnten nur die Versicherten in die Sekundäranalyse eingehen, die eine Influenzaimpfung oder eine Influenza- und Pneumokokkenimpfung erhalten hatten. Ungeimpfte Versicherte konnten nicht berücksichtigt werden, da diese per Definition im gesamten Beobachtungszeitraum der Sekundäranalyse (2012–2018) keine Influenzaimpfung erhalten hatten. Zur Minimierung eines Selektionsbias, wurden zudem Versicherte, die im Jahr 2014 ausschließlich eine Pneumokokkenimpfung erhalten hatten, nicht in der Sekundäranalyse berücksichtigt. Denn nur Versicherte, die 2014 ausschließlich gegen Pneumokokken geimpft wurden, können 2014 eine Influenzaimpfücke haben. Andere Gründe für eine Impflücke im Jahr 2014 wären dann – im Vergleich zu Impflücken in allen anderen Jahren – unterrepräsentiert. Somit haben alle Versicherten der Ausgangspopulation mindestens im Jahr 2014 eine Influenzaimpfung erhalten und können Impflücken in allen anderen Jahren des Beobachtungszeitraums haben. Insgesamt gingen die Daten von 142.022 Versicherten in die Ausgangspopulation der Sekundäranalyse ein (siehe Abb. A1).

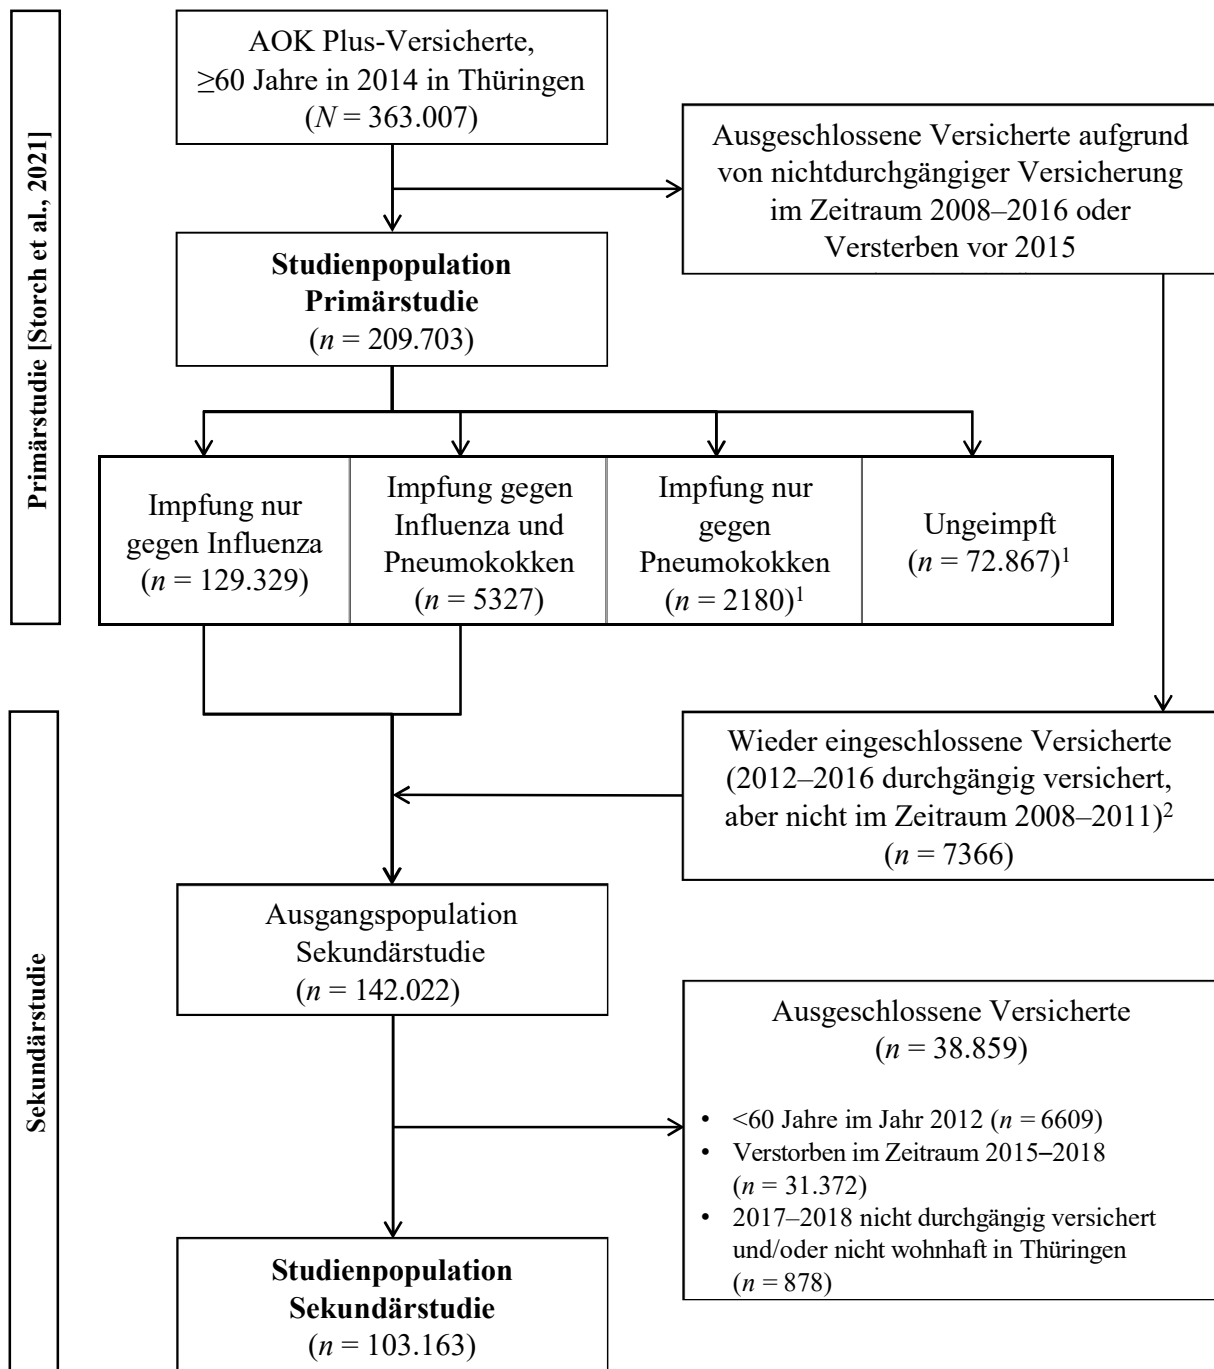

<sup>1</sup> Zur Minimierung eines Selektionsbias gingen Versicherte der Primärstudie, die ungeimpft oder nur gegen Pneumokokken geimpft waren, nicht in die Sekundärstudie ein.

<sup>2</sup> In der Primärstudie galt in allen Gruppen die durchgängige Versicherung im Zeitraum 2008-2016 als Einschlusskriterium. Für die Sekundärstudie kann diese Einschlussbedingung gelockert werden, indem Versicherte mit Influenzaimpfung, die 2012-2016 durchgängig und nur 2008-2011 nicht durchgängig bei der AOK Plus versichert waren, wieder eingeschlossen werden.

**Abb. A1: Flowchart zum Versicherteneinschluss. (Eigene Abbildung)**

## Datenaufbereitung: Identifikation von Inanspruchnahme- und Versichertenmerkmalen

Tab. A1: Impfungen

| Impfung                          | Gebührenordnungspositionen nach EBM (allgemeingültig und KVT-spezifisch)                    |
|----------------------------------|---------------------------------------------------------------------------------------------|
| Influenzaimpfung                 | 89111, 89112, 89112 N, 89960, 89960 A, 89960 E, 89960 B, 89960 I, 89960 K                   |
| Pneumokokkenimpfung <sup>1</sup> | 89118 A, 89118 B, 89119, 89120, 89120 R, 89964, 89964 A, 89964 E, 89964 B, 89964 I, 89964 K |

**EBM** Einheitlicher Bewertungsmaßstab; **KVT** Kassenärztliche Vereinigung Thüringen

<sup>1</sup> Diese Gebührenordnungspositionen wurden zur Überprüfung des Ausschlusskriteriums einer Pneumokokken-Impfung herangezogen.

**Tab. A2: Personen mit erhöhter gesundheitlicher Gefährdung<sup>2</sup>**

| <b>Grunderkrankung</b>      | <b>ICD-10-GM</b>                                                                                                                                                                                                                                                                                                                                                                                                                                                                                                                                                                                                                                                                                                                                                                                                                                                                                                                                                |
|-----------------------------|-----------------------------------------------------------------------------------------------------------------------------------------------------------------------------------------------------------------------------------------------------------------------------------------------------------------------------------------------------------------------------------------------------------------------------------------------------------------------------------------------------------------------------------------------------------------------------------------------------------------------------------------------------------------------------------------------------------------------------------------------------------------------------------------------------------------------------------------------------------------------------------------------------------------------------------------------------------------|
| Chronische Immunsuppression | M05, M06, M08, M30, M31, M32, M33, M34, M45, M120, M123, M350, M351, M352, M353, M354, M355, M356, M360, M461, M468, M469, K50, K51, L940, L941, L943 in Verbindung mit ATC: H01AB, H02B, L01XC02, L04<br><br>B20, B21, B22, B23, B24, C00, C01, C02, C03, C04, C05, C06, C07, C08, C09, C10, C11, C12, C13, C14, C15, C16, C17, C18, C19, C20, C21, C22, C23, C24, C25, C26, C30, C31, C32, C33, C34, C37, C40, C41, C43, C45, C46, C47, C48, C49, C50, C51, C52, C53, C54, C55, C56, C57, C58, C60, C61, C62, C63, C64, C65, C66, C67, C68, C69, C70, C71, C72, C73, C74, C75, C76, C77, C78, C79, C80, C81, C82, C83, C84, C85, C88, C90, C91, C92, C93, C94, C95, C96, C97, D45, D46, D56, D57, D58, D59, D60, D61, D63, D65, D66, D67, D68, D69, D70, D71, D72, D74, D75, D76, D77, D80, D81, D82, D83, D84, D89, D90, D471, D473, D474, D475, D477, D479, D730, D731, D732, D735, D738, D739, Q890, Q899, U60, U61, U603, Z08, Z21, Z94, Z510, Z511, Z512 |
| Herzerkrankung              | A520, I05, I06, I07, I08, I09, I11, I12, I13, I15, I20, I21, I22, I23, I24, I25, I26, I27, I28, I34, I35, I36, I37, I38, I39, I42, I43, I47, I48, I49, I50, I51, I52, I71, I731, I738, I771, I790, I792, K551, K558, K559, P290, Q20, Q21, Q22, Q23, Q24, Q251, Z952, Z953, Z954, Z958, Z959                                                                                                                                                                                                                                                                                                                                                                                                                                                                                                                                                                                                                                                                    |
| Lungenerkrankung            | C34, D860, D862, E84, I278, I279, J40, J41, J42, J43, J44, J45, J46, J47, J60, J61, J62, J63, J64, J65, J66, J67, J68, J69, J70, J80, J81, J82, J84, J96, P27                                                                                                                                                                                                                                                                                                                                                                                                                                                                                                                                                                                                                                                                                                                                                                                                   |
| Neurologische Erkrankung    | G10, G11, G12, G13, G14, G20, G21, G22, G23, G24, G25, G26, G30, G31, G32, G35, G36, G37, G40, G41, G45, G46, G70, G71, G72, G73, G80, G81, G82, G832, G834, G839, G931, G934, H34, I60, I61, I62, I63, I64, I65, I66, I67, I68, I69, R56, R470                                                                                                                                                                                                                                                                                                                                                                                                                                                                                                                                                                                                                                                                                                                 |
| Nierenerkrankung            | I12, I13, I701, I722, I823, N01, N02, N03, N04, N05, N06, N07, N08, N11, N12, N13, N14, N15, N16, N17, N18, N19, N250, Q60, Z49, Z940, Z992                                                                                                                                                                                                                                                                                                                                                                                                                                                                                                                                                                                                                                                                                                                                                                                                                     |
| Stoffwechselerkrankung      | E03, E05, E10, E11, E12, E13, E14, E15, E16, E20, E21, E22, E25, E26, E27, E31, E32, E66, E70, E71, E72, E74, E75, E76, E77, E78, E79, E80, E83, E84, E85, E88, E89, E90, G3181, T383                                                                                                                                                                                                                                                                                                                                                                                                                                                                                                                                                                                                                                                                                                                                                                           |
| Lebererkrankungen           | B15, B16, B17, B18, B19, F100, F102, F105, F106, F107, F108, F109, I85, I864, I982, K70, K73, K74, K76, K711, K713, K714, K715, K717, K721, K727, K729, K750, K751, K754, K758, K759                                                                                                                                                                                                                                                                                                                                                                                                                                                                                                                                                                                                                                                                                                                                                                            |

<sup>2</sup> Definition basierend auf der Influenza-Indikationsimpfempfehlung für Kinder, Jugendliche und Erwachsene mit erhöhter gesundheitlicher Gefährdung infolge eines Grundleidens [3].

**Tab. A3: Charlson-Komorbiditäten des Charlson Comorbidity-Index (CCI)<sup>3</sup>**

| Charlson-Komorbidität       | ICD-10-GM                                                                                                                                                                                                                                                                                                                                                                                                                                                                                                                                                                                                                                                                                                                                                                                                                                                                                                                                                                                                                                          |
|-----------------------------|----------------------------------------------------------------------------------------------------------------------------------------------------------------------------------------------------------------------------------------------------------------------------------------------------------------------------------------------------------------------------------------------------------------------------------------------------------------------------------------------------------------------------------------------------------------------------------------------------------------------------------------------------------------------------------------------------------------------------------------------------------------------------------------------------------------------------------------------------------------------------------------------------------------------------------------------------------------------------------------------------------------------------------------------------|
| Myocardial infarction       | I210, I211, I212, I213, I214, I219, I220, I221, I228, I229, I2520, I2521, I2522, I2529                                                                                                                                                                                                                                                                                                                                                                                                                                                                                                                                                                                                                                                                                                                                                                                                                                                                                                                                                             |
| Congestive heart failure    | I099, I255, I420, I425, I426, I427, I429, I430, I431, I432, I438, I509, I1100, I1101, I1300, I1301, I1320, I1321, I4280, I4288, I5000, I5001, I5011, I5012, I5013, I5014, I5019, P290                                                                                                                                                                                                                                                                                                                                                                                                                                                                                                                                                                                                                                                                                                                                                                                                                                                              |
| Peripheral vascular disease | I700, I701, I708, I709, I711, I712, I713, I714, I715, I716, I718, I719, I731, I738, I739, I771, I790, I792, I7020, I7021, I7022, I7023, I7024, I7025, I7100, I7101, I7102, I7103, I7104, I7105, I7106, I7107, K551, K559, K5581, K5582, K5588, Z959, Z9580, Z9581, Z9588                                                                                                                                                                                                                                                                                                                                                                                                                                                                                                                                                                                                                                                                                                                                                                           |
| Cerebrovascular disease     | G460, G461, G462, G463, G464, G465, G466, G467, G468, G4502, G4503, G4509, G4512, G4513, G4519, G4522, G4523, G4529, G4532, G4533, G4539, G4542, G4543, G4549, G4582, G4583, G4589, G4592, G4593, G4599, H340, I64, I600, I601, I602, I603, I604, I605, I606, I607, I608, I609, I610, I611, I612, I613, I614, I615, I616, I618, I619, I621, I629, I630, I631, I632, I633, I634, I635, I636, I638, I639, I650, I651, I652, I653, I658, I659, I660, I661, I662, I663, I664, I668, I669, I670, I672, I673, I674, I675, I676, I677, I679, I680, I681, I682, I688, I690, I691, I692, I693, I694, I698, I6710, I6711, I6200, I6201, I6202, I6209, I6780, I6788                                                                                                                                                                                                                                                                                                                                                                                           |
| Dementia                    | F03, F010, F011, F012, F013, F018, F019, F020, F021, F022, F023, F024, F028, F051, F000, F001, F002, F009, G300, G301, G308, G309, G311                                                                                                                                                                                                                                                                                                                                                                                                                                                                                                                                                                                                                                                                                                                                                                                                                                                                                                            |
| Chronic pulmonary disease   | I278, I279, J40, J42, J46, J47, J60, J61, J64, J65, J410, J411, J418, J430, J431, J432, J438, J439, J450, J451, J458, J459, J620, J628, J630, J631, J632, J633, J634, J635, J638, J660, J661, J662, J668, J670, J671, J672, J673, J674, J675, J676, J677, J678, J679, J684, J701, J703, J4400, J4401, J4402, J4403, J4409, J4410, J4411, J4412, J4413, J4419, J4480, J4481, J4482, J4483, J4489, J4490, J4491, J4492, J4493, J4499                                                                                                                                                                                                                                                                                                                                                                                                                                                                                                                                                                                                                 |
| Rheumatic disease           | M0500, M0501, M0502, M0503, M0504, M0505, M0506, M0507, M0508, M0509, M0510, M0511, M0512, M0513, M0514, M0515, M0516, M0517, M0518, M0519, M0520, M0521, M0522, M0523, M0524, M0525, M0526, M0527, M0528, M0529, M0530, M0531, M0532, M0533, M0534, M0535, M0536, M0537, M0538, M0539, M0580, M0581, M0582, M0583, M0584, M0585, M0586, M0587, M0588, M0589, M0590, M0591, M0592, M0593, M0594, M0595, M0596, M0597, M0598, M0599, M0600, M0601, M0602, M0603, M0604, M0605, M0606, M0607, M0608, M0609, M0610, M0611, M0612, M0613, M0614, M0615, M0616, M0617, M0618, M0619, M0620, M0621, M0622, M0623, M0624, M0625, M0626, M0627, M0628, M0629, M0630, M0631, M0632, M0633, M0634, M0635, M0636, M0637, M0638, M0639, M0640, M0641, M0642, M0643, M0644, M0645, M0646, M0647, M0648, M0649, M0680, M0681, M0682, M0683, M0684, M0685, M0686, M0687, M0688, M0689, M0690, M0691, M0692, M0693, M0694, M0695, M0696, M0697, M0698, M0699, M315, M320, M321, M328, M329, M330, M331, M332, M339, M340, M341, M342, M348, M349, M351, M353, M360 |
| Peptic ulcer disease        | K250, K251, K252, K253, K254, K255, K256, K257, K259, K260, K261, K262,                                                                                                                                                                                                                                                                                                                                                                                                                                                                                                                                                                                                                                                                                                                                                                                                                                                                                                                                                                            |

<sup>3</sup> Definition von Schwarzkopf et al. (2018) [4].

| Charlson-Komorbidity                  | ICD-10-GM                                                                                                                                                                                                                                                                                                                                                                                                                                                                                                                                                                                                                                                                                                                                                                                                                                                                                                                                                                                                                                                                                                                                                                                                                                                                                                                                                                                                                                                                                                                                                                                                                                                                                                                                                                                                                                                                                                         |
|---------------------------------------|-------------------------------------------------------------------------------------------------------------------------------------------------------------------------------------------------------------------------------------------------------------------------------------------------------------------------------------------------------------------------------------------------------------------------------------------------------------------------------------------------------------------------------------------------------------------------------------------------------------------------------------------------------------------------------------------------------------------------------------------------------------------------------------------------------------------------------------------------------------------------------------------------------------------------------------------------------------------------------------------------------------------------------------------------------------------------------------------------------------------------------------------------------------------------------------------------------------------------------------------------------------------------------------------------------------------------------------------------------------------------------------------------------------------------------------------------------------------------------------------------------------------------------------------------------------------------------------------------------------------------------------------------------------------------------------------------------------------------------------------------------------------------------------------------------------------------------------------------------------------------------------------------------------------|
|                                       | K263, K264, K265, K266, K267, K269, K270, K271, K272, K273, K274, K275, K276, K277, K279, K280, K281, K282, K283, K284, K285, K286, K287, K289                                                                                                                                                                                                                                                                                                                                                                                                                                                                                                                                                                                                                                                                                                                                                                                                                                                                                                                                                                                                                                                                                                                                                                                                                                                                                                                                                                                                                                                                                                                                                                                                                                                                                                                                                                    |
| Mild liver disease                    | B180, B181, B182, B188, B189, K700, K701, K702, K703, K709, K713, K714, K715, K717, K730, K731, K732, K738, K739, K740, K741, K742, K743, K744, K745, K746, K760, K762, K763, K764, K768, K769, Z944                                                                                                                                                                                                                                                                                                                                                                                                                                                                                                                                                                                                                                                                                                                                                                                                                                                                                                                                                                                                                                                                                                                                                                                                                                                                                                                                                                                                                                                                                                                                                                                                                                                                                                              |
| Diabetes without chronic complication | E1001, E1080, E1011, E1060, E1061, E1081, E1090, E1091, E1101, E1111, E1160, E1161, E1180, E1181, E1190, E1191, E1201, E1211, E1260, E1261, E1280, E1281, E1290, E1291, E1301, E1311, E1360, E1361, E1380, E1381, E1390, E1391, E1401, E1411, E1460, E1461, E1480, E1481, E1490, E1491                                                                                                                                                                                                                                                                                                                                                                                                                                                                                                                                                                                                                                                                                                                                                                                                                                                                                                                                                                                                                                                                                                                                                                                                                                                                                                                                                                                                                                                                                                                                                                                                                            |
| Diabetes with chronic complication    | E1020, E1021, E1030, E1031, E1040, E1041, E1050, E1051, E1072, E1073, E1074, E1075, E1120, E1121, E1130, E1131, E1140, E1141, E1150, E1151, E1172, E1173, E1174, E1175, E1220, E1221, E1230, E1231, E1240, E1241, E1250, E1251, E1272, E1273, E1274, E1275, E1320, E1321, E1330, E1331, E1340, E1341, E1350, E1351, E1372, E1373, E1374, E1375, E1420, E1421, E1430, E1431, E1440, E1441, E1450, E1451, E1472, E1473, E1474, E1475                                                                                                                                                                                                                                                                                                                                                                                                                                                                                                                                                                                                                                                                                                                                                                                                                                                                                                                                                                                                                                                                                                                                                                                                                                                                                                                                                                                                                                                                                |
| Hemiplegia or paraplegia              | G041, G114, G801, G802, G810, G811, G819, G830, G831, G832, G833, G839, G8200, G8201, G8202, G8203, G8209, G8210, G8211, G8212, G8213, G8219, G8220, G8221, G8222, G8223, G8229, G8230, G8231, G8232, G8233, G8239, G8240, G8241, G8242, G8243, G8249, G8250, G8251, G8252, G8253, G8259, G8260, G8261, G8262, G8263, G8264, G8265, G8266, G8267, G8269, G8340, G8341, G8349                                                                                                                                                                                                                                                                                                                                                                                                                                                                                                                                                                                                                                                                                                                                                                                                                                                                                                                                                                                                                                                                                                                                                                                                                                                                                                                                                                                                                                                                                                                                      |
| Renal disease                         | I1200, I1201, I1310, I1311, N19, N032, N033, N034, N035, N036, N037, N052, N053, N054, N055, N056, N057, N181, N182, N183, N184, N185, N189, N250, N1880, N1889, Z490, Z491, Z492, Z940, Z992                                                                                                                                                                                                                                                                                                                                                                                                                                                                                                                                                                                                                                                                                                                                                                                                                                                                                                                                                                                                                                                                                                                                                                                                                                                                                                                                                                                                                                                                                                                                                                                                                                                                                                                     |
| Any malignancy                        | C000, C001, C002, C003, C004, C005, C006, C008, C009, C01, C020, C021, C022, C023, C024, C028, C029, C030, C031, C039, C040, C041, C048, C049, C050, C051, C052, C058, C059, C060, C061, C062, C068, C069, C07, C080, C081, C088, C089, C090, C091, C098, C099, C100, C101, C102, C103, C104, C108, C109, C110, C111, C112, C113, C118, C119, C12, C130, C131, C132, C138, C139, C140, C142, C148, C150, C151, C152, C153, C154, C155, C158, C159, C160, C161, C162, C163, C164, C165, C166, C168, C169, C170, C171, C172, C173, C178, C179, C180, C181, C182, C183, C184, C185, C186, C187, C188, C189, C19, C20, C210, C211, C212, C218, C220, C221, C222, C223, C224, C227, C229, C23, C240, C241, C248, C249, C250, C251, C252, C253, C254, C257, C258, C259, C260, C261, C268, C269, C300, C301, C310, C311, C312, C313, C318, C319, C320, C321, C322, C323, C328, C329, C33, C340, C341, C342, C343, C348, C349, C37, C380, C381, C382, C383, C384, C388, C390, C398, C399, C400, C401, C402, C403, C408, C409, C4101, C4102, C411, C412, C4130, C4131, C4132, C414, C418, C419, C430, C431, C432, C433, C434, C435, C436, C437, C438, C439, C450, C451, C452, C457, C459, C460, C461, C462, C463, C467, C468, C469, C470, C471, C472, C473, C474, C475, C476, C478, C479, C480, C481, C482, C488, C490, C491, C492, C493, C494, C495, C496, C498, C499, C500, C501, C502, C503, C504, C505, C506, C508, C509, C510, C511, C512, C518, C519, C52, C530, C531, C538, C539, C540, C541, C542, C543, C548, C549, C55, C56, C570, C571, C572, C573, C574, C577, C578, C579, C58, C600, C601, C602, C608, C609, C61, C620, C621, C629, C630, C631, C632, C637, C638, C639, C64, C65, C66, C670, C671, C672, C673, C674, C675, C676, C677, C678, C679, C680, C681, C688, C689, C690, C691, C692, C693, C694, C695, C696, C698, C699, C700, C701, C709, C710, C711, C712, C713, C714, C715, C716, C717, C718, C719 |



| Charlson-Komorbidität            | ICD-10-GM                                                                                                                                                                                                                                                                                                                                                                                                                                                                                                                                                                                                                                                                                                                                                                                                                                                                                                                                                                                                                                                                                                                                  |
|----------------------------------|--------------------------------------------------------------------------------------------------------------------------------------------------------------------------------------------------------------------------------------------------------------------------------------------------------------------------------------------------------------------------------------------------------------------------------------------------------------------------------------------------------------------------------------------------------------------------------------------------------------------------------------------------------------------------------------------------------------------------------------------------------------------------------------------------------------------------------------------------------------------------------------------------------------------------------------------------------------------------------------------------------------------------------------------------------------------------------------------------------------------------------------------|
|                                  | C720, C721, C722, C723, C724, C725, C728, C729, C73, C740, C741, C749, C750, C751, C752, C753, C754, C755, C758, C759, C760, C761, C762, C763, C764, C765, C767, C768, C810, C811, C812, C813, C814, C817, C819, C820, C821, C822, C823, C824, C825, C826, C827, C829, C830, C831, C833, C835, C837, C838, C839, C840, C841, C844, C845, C846, C847, C848, C849, C851, C852, C857, C859, C860, C861, C862, C863, C864, C865, C866, C8800, C8801, C8820, C8821, C8830, C8831, C8840, C8841, C8870, C8871, C8890, C8891, C9000, C9001, C9010, C9011, C9020, C9021, C9030, C9031, C9100, C9101, C9110, C9111, C9130, C9131, C9140, C9141, C9150, C9151, C9160, C9161, C9170, C9171, C9180, C9181, C9190, C9191, C9200, C9201, C9210, C9211, C9220, C9221, C9230, C9231, C9240, C9241, C9250, C9251, C9260, C9261, C9270, C9271, C9280, C9281, C9290, C9291, C9300, C9301, C9310, C9311, C9330, C9331, C9370, C9371, C9390, C9391, C9400, C9401, C9420, C9421, C9430, C9431, C9440, C9441, C9460, C9461, C9470, C9471, C948, C9500, C9501, C9510, C9511, C9570, C9571, C958, C9590, C9591, C960, C962, C964, C965, C966, C967, C968, C969, C97 |
| Moderate or severe liver disease | I850, I859, I864, I982, I983, K704, K711, K721, K729, K765, K766, K767                                                                                                                                                                                                                                                                                                                                                                                                                                                                                                                                                                                                                                                                                                                                                                                                                                                                                                                                                                                                                                                                     |
| Metastatic solid tumor           | C770, C771, C772, C773, C774, C775, C778, C779, C780, C781, C782, C783, C784, C785, C786, C787, C788, C790, C791, C792, C793, C794, C795, C796, C797, C799, C800, C809, C7981, C7982, C7983, C7984, C7988                                                                                                                                                                                                                                                                                                                                                                                                                                                                                                                                                                                                                                                                                                                                                                                                                                                                                                                                  |
| AIDS/HIV                         | B20, B21, B22, B24                                                                                                                                                                                                                                                                                                                                                                                                                                                                                                                                                                                                                                                                                                                                                                                                                                                                                                                                                                                                                                                                                                                         |

## Ergebnisse

Tab. A4: Beschreibung der Studienpopulation, differenziert nach Anzahl der Influenzaimpfungen

|                                   | Anzahl der Influenzaimpfungen 2012–2018 |                                 |                                 |                                 |                                   |                                   |                                   |                              |
|-----------------------------------|-----------------------------------------|---------------------------------|---------------------------------|---------------------------------|-----------------------------------|-----------------------------------|-----------------------------------|------------------------------|
|                                   | 1<br><i>n</i> = 1.213<br>(1,2%)         | 2<br><i>n</i> = 2.056<br>(2,0%) | 3<br><i>n</i> = 3.944<br>(3,8%) | 4<br><i>n</i> = 6.618<br>(6,4%) | 5<br><i>n</i> = 11.596<br>(11,2%) | 6<br><i>n</i> = 23.971<br>(23,2%) | 7<br><i>n</i> = 53.765<br>(52,1%) | Gesamt<br><i>N</i> = 103.163 |
| <b>Alter</b>                      |                                         |                                 |                                 |                                 |                                   |                                   |                                   |                              |
| Alter (Jahre), MW (SD)            | 71,03<br>(7,2)                          | 71,40<br>(7,4)                  | 72,16<br>(7,4)                  | 72,46<br>(7,3)                  | 72,39<br>(7,3)                    | 72,83<br>(7,1)                    | 72,61<br>(6,8)                    | <b>72,57</b><br>(7,0)        |
| <b>Altersgruppe, <i>n</i> (%)</b> |                                         |                                 |                                 |                                 |                                   |                                   |                                   |                              |
| 60–69 Jahre                       | 520<br>(42,9%)                          | 829<br>(40,3%)                  | 1.440<br>(36,5%)                | 2.253<br>(34,0%)                | 4.050<br>(34,9%)                  | 7.592<br>(31,7%)                  | 17.005<br>(31,6%)                 | <b>33.689</b><br>(32,7%)     |
| 70–79 Jahre                       | 519<br>(42,8%)                          | 905<br>(44,0%)                  | 1.801<br>(45,7%)                | 3.076<br>(46,5%)                | 5.457<br>(47,1%)                  | 11.902<br>(49,7%)                 | 27.825<br>(51,8%)                 | <b>51.485</b><br>(49,9%)     |
| 80–89 Jahre                       | 170<br>(14,0%)                          | 312<br>(15,2%)                  | 675<br>(17,1%)                  | 1.249<br>(18,9%)                | 2.016<br>(17,4%)                  | 4.278<br>(17,8%)                  | 8.615<br>(16,0%)                  | <b>17.315</b><br>(16,8%)     |
| ≥ 90 Jahre                        | 4<br>(0,3%)                             | 10<br>(0,5%)                    | 28<br>(0,7%)                    | 40<br>(0,6%)                    | 73<br>(0,6%)                      | 199<br>(0,8%)                     | 320<br>(0,6%)                     | <b>674</b><br>(0,7%)         |
| <b>Geschlecht, <i>n</i> (%)</b>   |                                         |                                 |                                 |                                 |                                   |                                   |                                   |                              |
| männlich                          | 490<br>(40,4%)                          | 733<br>(35,7%)                  | 1.383<br>(35,1%)                | 2.304<br>(34,8%)                | 4.285<br>(37,0%)                  | 8.981<br>(37,5%)                  | 21.951<br>(40,8%)                 | <b>40.127</b><br>(38,9%)     |
| weiblich                          | 723<br>(59,6%)                          | 1.323<br>(64,3%)                | 2.561<br>(64,9%)                | 4.314<br>(65,2%)                | 7.311<br>(63,0%)                  | 14.990<br>(62,5%)                 | 31.814<br>(59,2%)                 | <b>63.036</b><br>(61,1%)     |

| Anzahl der Influenzaimpfungen 2012–2018        |                          |                          |                          |                          |                            |                            |                            |                          |
|------------------------------------------------|--------------------------|--------------------------|--------------------------|--------------------------|----------------------------|----------------------------|----------------------------|--------------------------|
|                                                | 1<br>n = 1.213<br>(1,2%) | 2<br>n = 2.056<br>(2,0%) | 3<br>n = 3.944<br>(3,8%) | 4<br>n = 6.618<br>(6,4%) | 5<br>n = 11.596<br>(11,2%) | 6<br>n = 23.971<br>(23,2%) | 7<br>n = 53.765<br>(52,1%) | Gesamt<br>N = 103.163    |
| <b>Pflegestufe zum 31.12.2013, n (%)</b>       |                          |                          |                          |                          |                            |                            |                            |                          |
| keine Pflegestufe                              | 1.087<br>(89,6%)         | 1.853<br>(90,1%)         | 3.575<br>(90,6%)         | 5.937<br>(89,7%)         | 10.332<br>(89,1%)          | 21.576<br>(90,0%)          | 49.463<br>(92,0%)          | <b>93.823</b><br>(90,9%) |
| Pflegestufe 1 (inkl. Pflegestufe 0)            | 88<br>(7,3%)             | 135<br>(6,6%)            | 269<br>(6,8%)            | 507<br>(7,7%)            | 909<br>(7,8%)              | 1.693<br>(7,1%)            | 3.077<br>(5,7%)            | <b>6.678</b><br>(6,5%)   |
| Pflegestufe 2                                  | 34<br>(2,8%)             | 59<br>(2,9%)             | 78<br>(2,0%)             | 151<br>(2,3%)            | 287<br>(2,5%)              | 601<br>(2,5%)              | 1.014<br>(1,9%)            | <b>2.224</b><br>(2,2%)   |
| Pflegestufe 3 (inkl. Härtefälle)               | 4<br>(0,3%)              | 9<br>(0,4%)              | 22<br>(0,6%)             | 23<br>(0,3%)             | 68<br>(0,6%)               | 101<br>(0,4%)              | 211<br>(0,4%)              | <b>438</b><br>(0,4%)     |
| <b>Pflegeheim im Zeitraum 2012–2018, n (%)</b> |                          |                          |                          |                          |                            |                            |                            |                          |
| durchgängig nicht im Pflegeheim lebend         | 1.120<br>(92,3%)         | 1.855<br>(90,2%)         | 3.475<br>(88,1%)         | 5.754<br>(86,9%)         | 10.023<br>(86,4%)          | 21.191<br>(88,4%)          | 49.418<br>(91,9%)          | <b>92.836</b><br>(90,0%) |
| durchgängig im Pflegeheim lebend               | 13<br>(1,1%)             | 31<br>(1,5%)             | 61<br>(1,5%)             | 116<br>(1,8%)            | 223<br>(1,9%)              | 479<br>(2,0%)              | 1.115<br>(2,1%)            | <b>2.038</b><br>(2,0%)   |
| Mischform                                      | 80<br>(6,6%)             | 170<br>(8,3%)            | 408<br>(10,3%)           | 748<br>(11,3%)           | 1.350<br>(11,6%)           | 2.301<br>(9,6%)            | 3.232<br>(6,0%)            | <b>8.289</b><br>(8,0%)   |
| <b>DMP-Teilnahme im Zeitraum 2012–2018</b>     |                          |                          |                          |                          |                            |                            |                            |                          |
| Teilnahme an mind. 1 DMP, n (%)                | 687<br>(56,6%)           | 1.207<br>(58,7%)         | 2.358<br>(59,8%)         | 4.084<br>(61,7%)         | 7.352<br>(63,4%)           | 15.553<br>(64,9%)          | 34.467<br>(64,1%)          | <b>65.708</b><br>(63,7%) |

| Anzahl der Influenzaimpfungen 2012–2018                                                                  |                          |                          |                          |                          |                            |                            |                            |                          |
|----------------------------------------------------------------------------------------------------------|--------------------------|--------------------------|--------------------------|--------------------------|----------------------------|----------------------------|----------------------------|--------------------------|
|                                                                                                          | 1<br>n = 1.213<br>(1,2%) | 2<br>n = 2.056<br>(2,0%) | 3<br>n = 3.944<br>(3,8%) | 4<br>n = 6.618<br>(6,4%) | 5<br>n = 11.596<br>(11,2%) | 6<br>n = 23.971<br>(23,2%) | 7<br>n = 53.765<br>(52,1%) | Gesamt<br>N = 103.163    |
| Jahre mit DMP-Teilnahme,<br>MW (SD)                                                                      | 1,41<br>(1,8)            | 1,43<br>(1,8)            | 1,49<br>(1,8)            | 1,56<br>(1,8)            | 1,68<br>(1,9)              | 1,76<br>(1,9)              | 1,78<br>(2,0)              | <b>1,73</b><br>(1,9)     |
| <b>Personen mit erhöhter gesundheitlicher Gefährdung (gem. STIKO-Impfempfehlung) im Jahr 2013, n (%)</b> |                          |                          |                          |                          |                            |                            |                            |                          |
| <b>Personen mit erhöhter<br/>gesundheitlicher Gefährdung</b>                                             | 1.031<br>(85,0%)         | 1.821<br>(88,6%)         | 3.560<br>(90,3%)         | 6.104<br>(92,2%)         | 10.743<br>(92,6%)          | 22.484<br>(93,8%)          | 50.284<br>(93,5%)          | <b>96.027</b><br>(93,1%) |
| Chronische Immunsuppression                                                                              | 191<br>(15,7%)           | 325<br>(15,8%)           | 635<br>(16,1%)           | 1.110<br>(16,8%)         | 2.020<br>(17,4%)           | 4.509<br>(18,8%)           | 9.790<br>(18,2%)           | <b>18.580</b><br>(18,0%) |
| Herzerkrankung                                                                                           | 604<br>(49,8%)           | 1.113<br>(54,1%)         | 2.191<br>(55,6%)         | 3.781<br>(57,1%)         | 6.843<br>(59,0%)           | 14.456<br>(60,3%)          | 32.111<br>(59,7%)          | <b>61.099</b><br>(59,2%) |
| Lungenerkrankung                                                                                         | 288<br>(23,7%)           | 511<br>(24,9%)           | 1.011<br>(25,6%)         | 1.662<br>(25,1%)         | 2.925<br>(25,2%)           | 6.047<br>(25,2%)           | 12.961<br>(24,1%)          | <b>25.405</b><br>(24,6%) |
| Nierenerkrankung                                                                                         | 200<br>(16,5%)           | 365<br>(17,8%)           | 745<br>(18,9%)           | 1.337<br>(20,2%)         | 2.408<br>(20,8%)           | 5.054<br>(21,1%)           | 10.853<br>(20,2%)          | <b>20.962</b><br>(20,3%) |
| Stoffwechselerkrankung                                                                                   | 817<br>(67,4%)           | 1.464<br>(71,2%)         | 2.935<br>(74,4%)         | 5.043<br>(76,2%)         | 9.021<br>(77,8%)           | 18.922<br>(78,9%)          | 42.457<br>(79,0%)          | <b>80.659</b><br>(78,2%) |
| Neurologische Erkrankung                                                                                 | 279<br>(23,0%)           | 493<br>(24,0%)           | 1.024<br>(26,0%)         | 1.762<br>(26,6%)         | 3.157<br>(27,2%)           | 6.626<br>(27,6%)           | 14.366<br>(26,7%)          | <b>27.707</b><br>(26,9%) |
| <b>Summe der Charlson-Komorbiditäten des Charlson Comorbidity-Index (CCI) im Jahr 2013, n (%)</b>        |                          |                          |                          |                          |                            |                            |                            |                          |
| CCI: 0                                                                                                   | 363<br>(29,9%)           | 531<br>(25,8%)           | 978<br>(24,8%)           | 1.453<br>(22,0%)         | 2.429<br>(20,9%)           | 4.758<br>(19,8%)           | 11.350<br>(21,1%)          | <b>21.862</b><br>(21,2%) |

| Anzahl der Influenzaimpfungen 2012–2018                                     |                                 |                                 |                                 |                                 |                                   |                                   |                                   |                              |
|-----------------------------------------------------------------------------|---------------------------------|---------------------------------|---------------------------------|---------------------------------|-----------------------------------|-----------------------------------|-----------------------------------|------------------------------|
|                                                                             | 1<br><i>n</i> = 1.213<br>(1,2%) | 2<br><i>n</i> = 2.056<br>(2,0%) | 3<br><i>n</i> = 3.944<br>(3,8%) | 4<br><i>n</i> = 6.618<br>(6,4%) | 5<br><i>n</i> = 11.596<br>(11,2%) | 6<br><i>n</i> = 23.971<br>(23,2%) | 7<br><i>n</i> = 53.765<br>(52,1%) | Gesamt<br><i>N</i> = 103.163 |
| CCI: 1                                                                      | 336<br>(27,7%)                  | 522<br>(25,4%)                  | 1.025<br>(26,0%)                | 1.737<br>(26,2%)                | 2.915<br>(25,1%)                  | 5.953<br>(24,8%)                  | 13.572<br>(25,2%)                 | <b>26.060</b><br>(25,3%)     |
| CCI: 2–4                                                                    | 420<br>(34,6%)                  | 824<br>(40,1%)                  | 1.592<br>(40,4%)                | 2.761<br>(41,7%)                | 5.111<br>(44,1%)                  | 10.749<br>(44,8%)                 | 23.663<br>(44,0%)                 | <b>45.120</b><br>(43,7%)     |
| CCI: ≥ 5                                                                    | 94<br>(7,7%)                    | 179<br>(8,7%)                   | 349<br>(8,8%)                   | 667<br>(10,1%)                  | 1.141<br>(9,8%)                   | 2.511<br>(10,5%)                  | 5.180<br>(9,6%)                   | <b>10.121</b><br>(9,8%)      |
| Anzahl der Influenzaimpfungen pro Patient:in abgerechnet durch... , MW (SD) |                                 |                                 |                                 |                                 |                                   |                                   |                                   |                              |
| einen Hausarzt/eine Hausärztin                                              | 0,97<br>(0,2)                   | 1,93<br>(0,3)                   | 2,90<br>(0,4)                   | 3,91<br>(0,5)                   | 4,89<br>(0,6)                     | 5,88<br>(0,6)                     | 6,88<br>(0,7)                     | <b>5,91</b><br>(1,5)         |
| dieselbe Praxis                                                             | 1,00<br>(0,0)                   | 1,84<br>(0,4)                   | 2,76<br>(0,5)                   | 3,64<br>(0,7)                   | 4,51<br>(0,8)                     | 5,41<br>(1,0)                     | 6,39<br>(1,1)                     | <b>5,48</b><br>(1,6)         |

**DMP** Disease-Management-Programm; **MW** Mittelwert; **SD** Standardabweichung; **STIKO** Ständige Impfkommission

## Literatur

1. Storch J, Fleischmann-Struzek C, Rose N et al. (2021) The effect of influenza and pneumococcal vaccination in the elderly on health service utilisation and costs: a claims data-based cohort study. *Eur J Health Econ* 23:67–80. <https://doi.org/10.1007/s10198-021-01343-8>
2. Rose N, Storch J, Mikolajetz A et al. (2021) Preventive effects of influenza and pneumococcal vaccination in the elderly - results from a population-based retrospective cohort study. *Hum Vaccin Immunother*:1–9. <https://doi.org/10.1080/21645515.2020.1845525>
3. Robert Koch-Institut (2014) Empfehlungen der Ständigen Impfkommission (STIKO) am Robert Koch-Institut/Stand: August 2014. *Epid Bull* 34:305-340
4. Schwarzkopf D, Fleischmann-Struzek C, Rüdell H, Reinhart K, Thomas-Rüdell DO (2018) A risk- model for hospital mortality among patients with severe sepsis or septic shock based on German national administrative claims data. *PLoS ONE* 13:e0194371. <https://doi.org/10.1371/journal.pone.0194371>
